# Supplementary material for: Hollow carbon nanobubbles: monocrystalline MOF nanobubbles and their pyrolysis
Source: Royal Society of Chemistry journal article supplement (doi:10.1039/c6sc04903f), 2017-01-01
Supplement: c6sc04903f1.pdf [file c6sc04903f1.pdf]

## Electronic Supporting Information

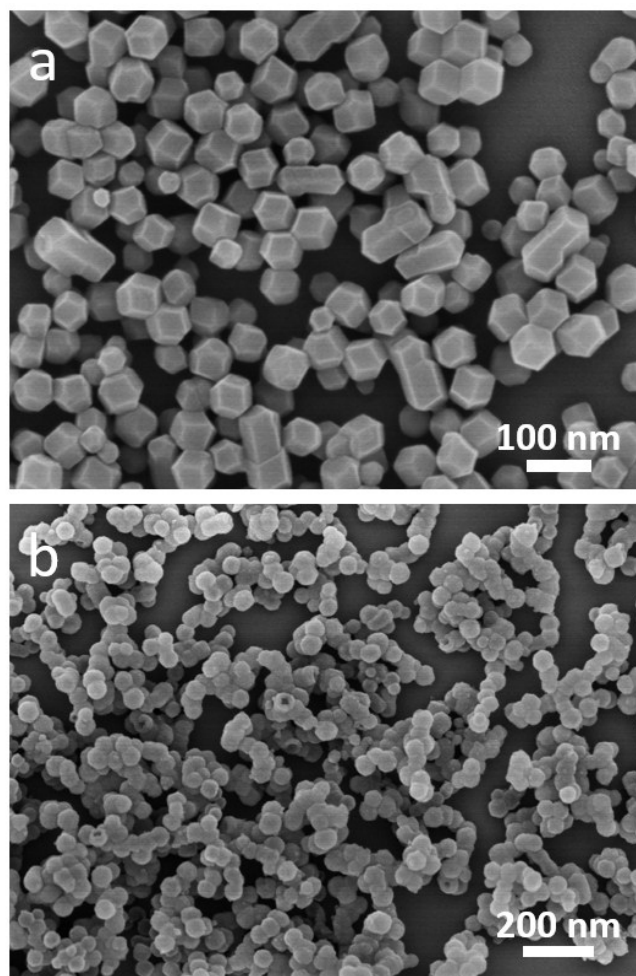

**Fig. S1** SEM images of (a) the parent ZIF-8 nanocrystals and (b) the etched ZIF-8 nanobubbles.

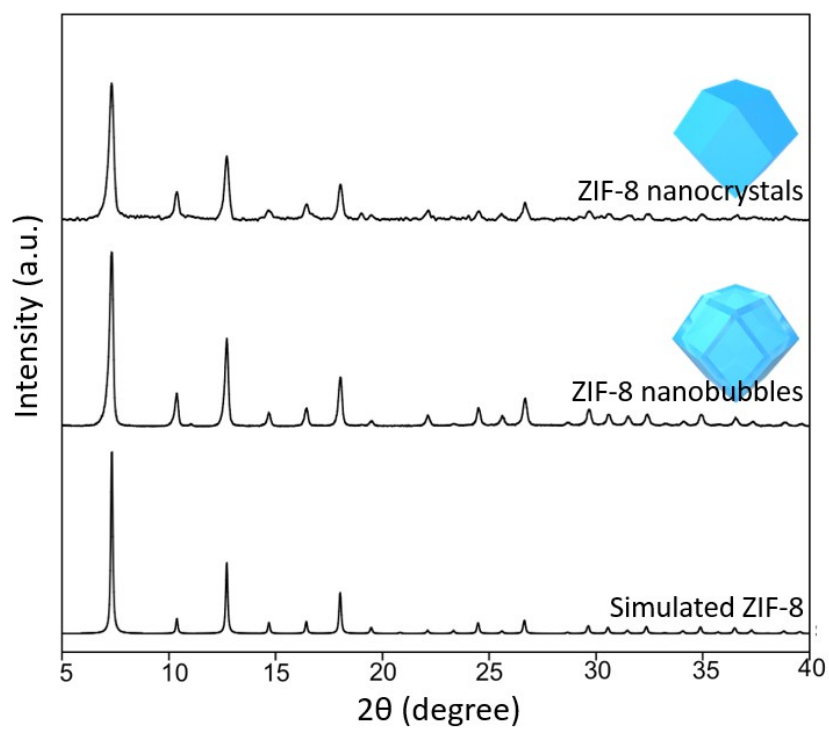

**Fig. S2** Wide-angle PXRD profiles of the parent ZIF-8 nanocrystals, the ZIF-8 nanobubbles, and the simulated ZIF-8 pattern from single-crystal data.

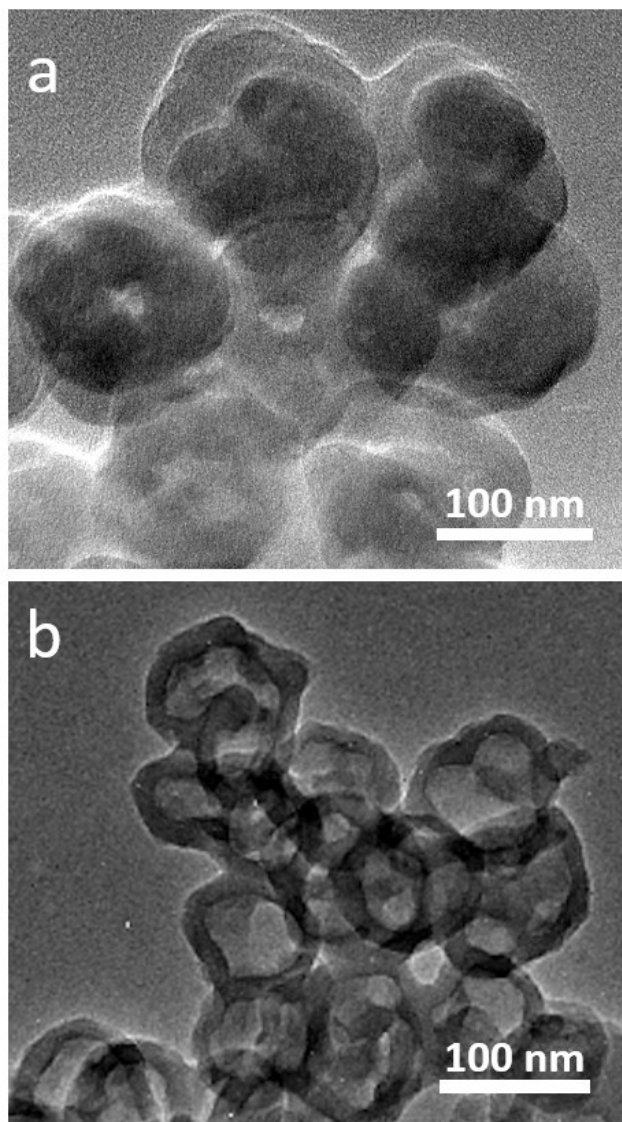

**Fig. S3** TEM images of (a) the parent ZIF-7 nanocrystals and (b) the etched ZIF-7 nanobubbles.

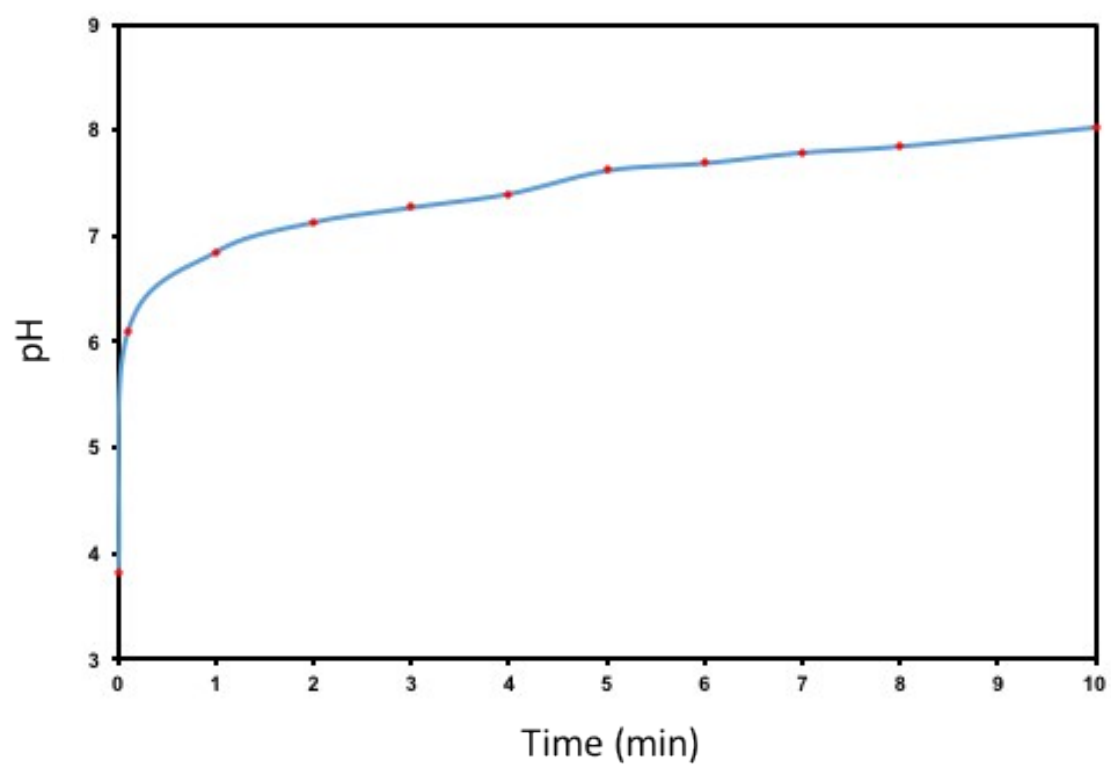

**Fig. S4** pH change of the suspension of ZIF-8 nanoparticles in tannic acid versus time.

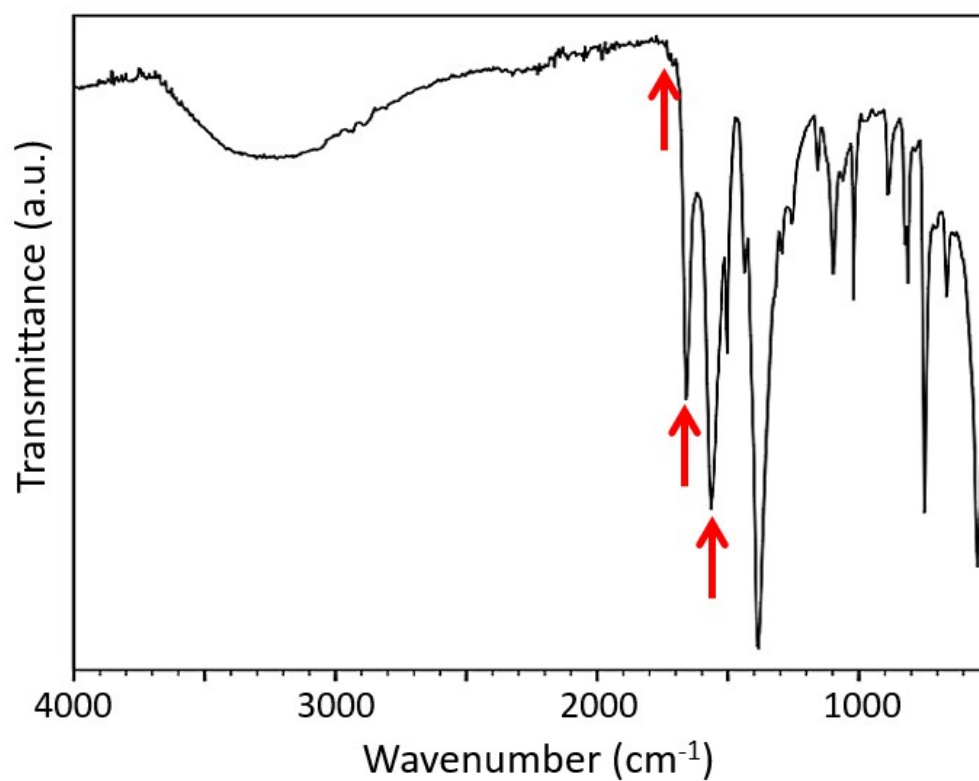

**Fig. S5** FTIR spectrum of the ZIF-8 nanobubbles treated with tannic acid molecules. The arrows indicate the typical bands that are assignable to the adsorbed tannic acid molecules.

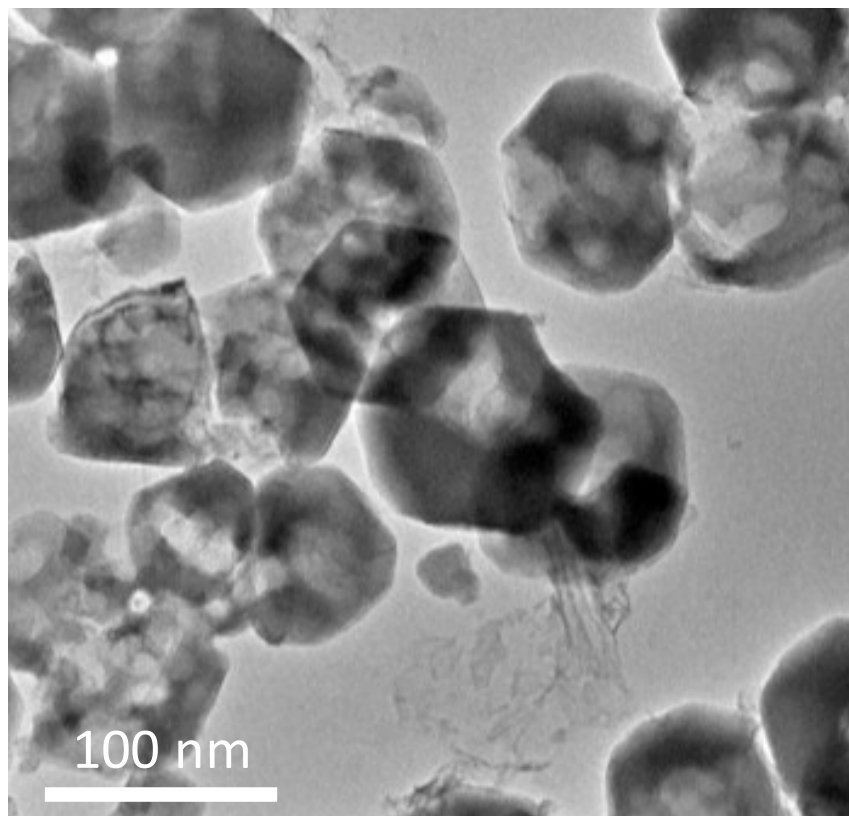

**Fig. S6** TEM images of ZIF-8 etched by polymaleic acid.

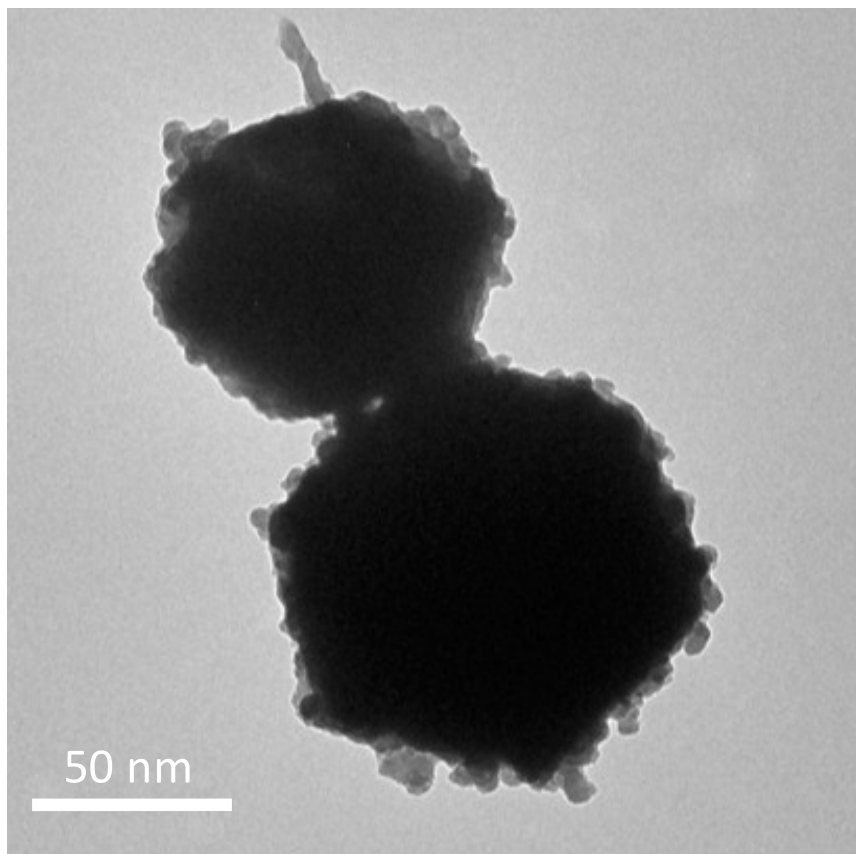

**Fig. S7** TEM images of ZIF-8 etched by hyaluronic acid.

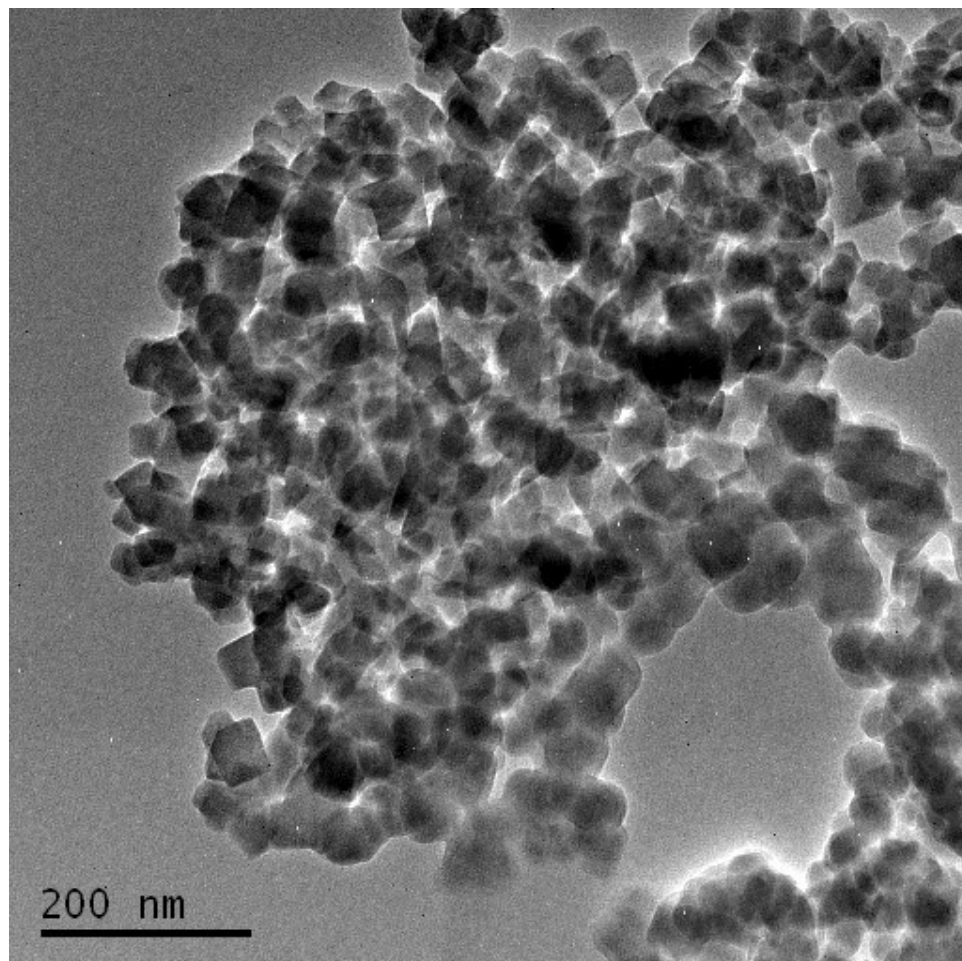

**Fig. S8** TEM images of UIO-66 etched by tannic acid.



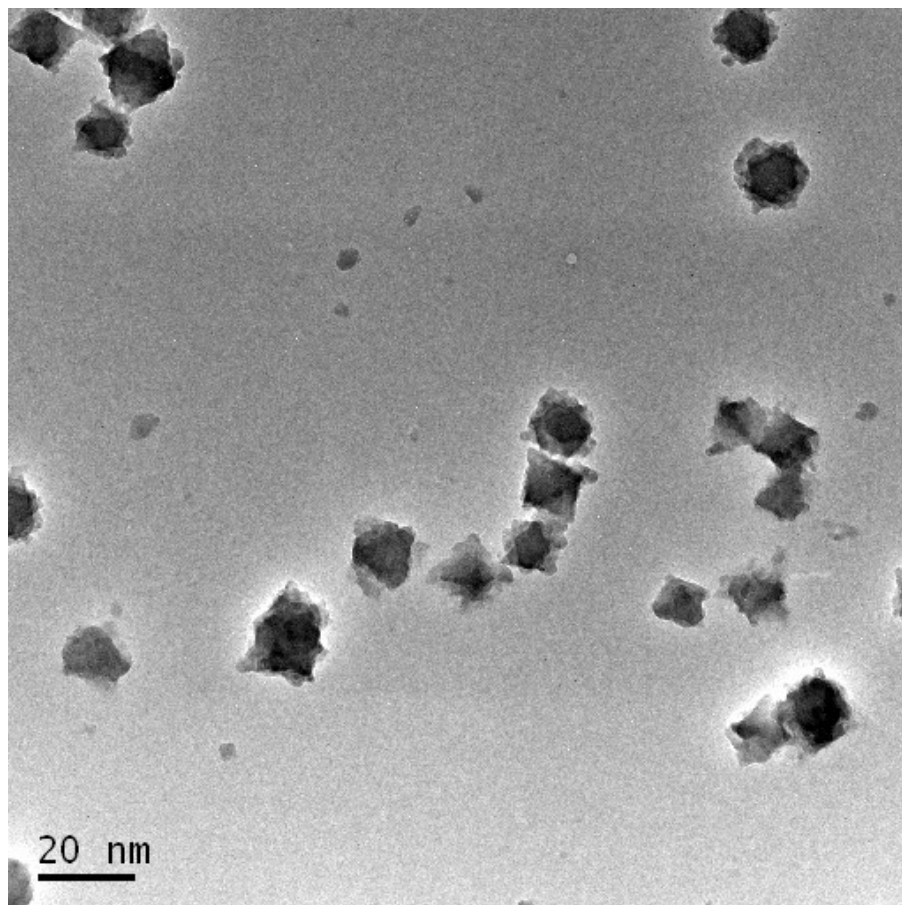

**Fig. S9** TEM images of MIL-101 etched by tannic acid.

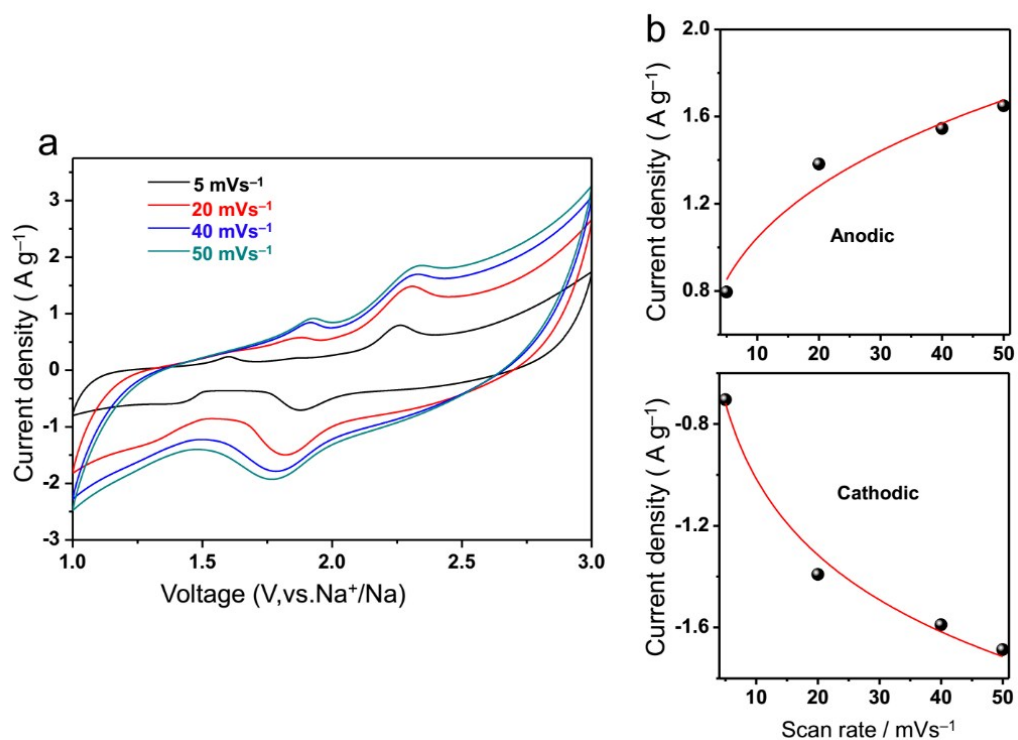

**Fig. S10** (a) CV curves of the non-hollow carbon nanoparticles between 1 and 3 V (vs  $\text{Na}^+/\text{Na}$ ) at various rate in the range of 5-40  $\text{mV} \cdot \text{s}^{-1}$ . (b) The dependence of anodic and cathodic current (at 2.0 V) on scanning rate.

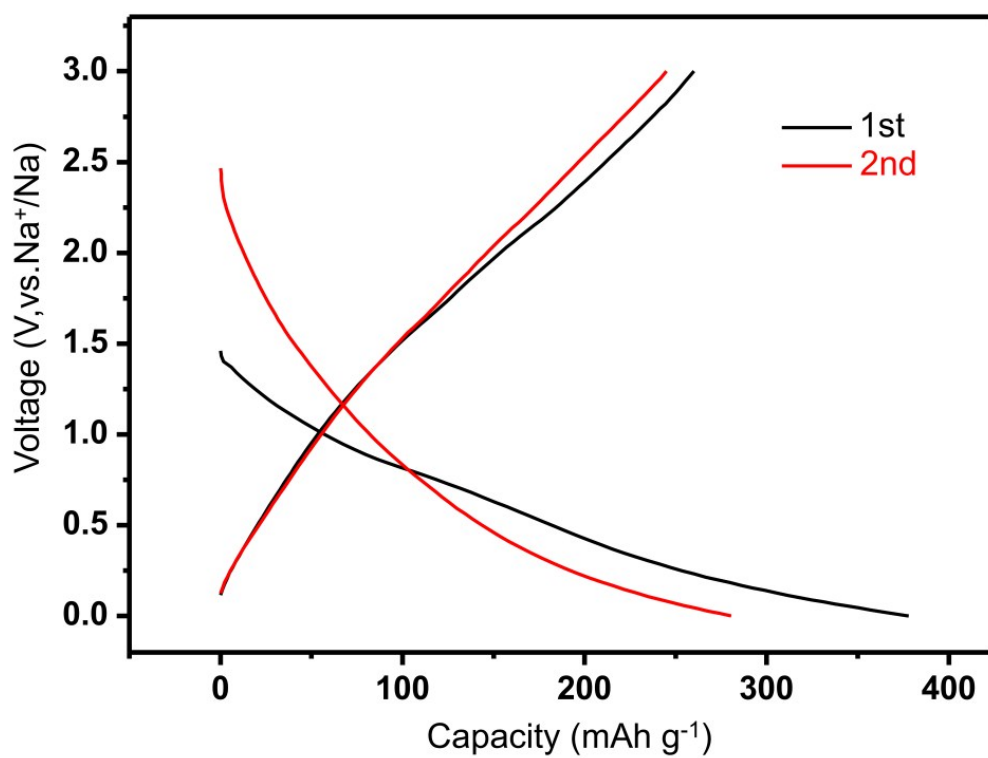

**Fig. S11** Galvanostatic charge/discharge curves for the hollow carbon nanobubbles between 0.001 and 3.000 V (vs Na<sup>+</sup>/Na) at a current density of 50 mA·g<sup>-1</sup>.

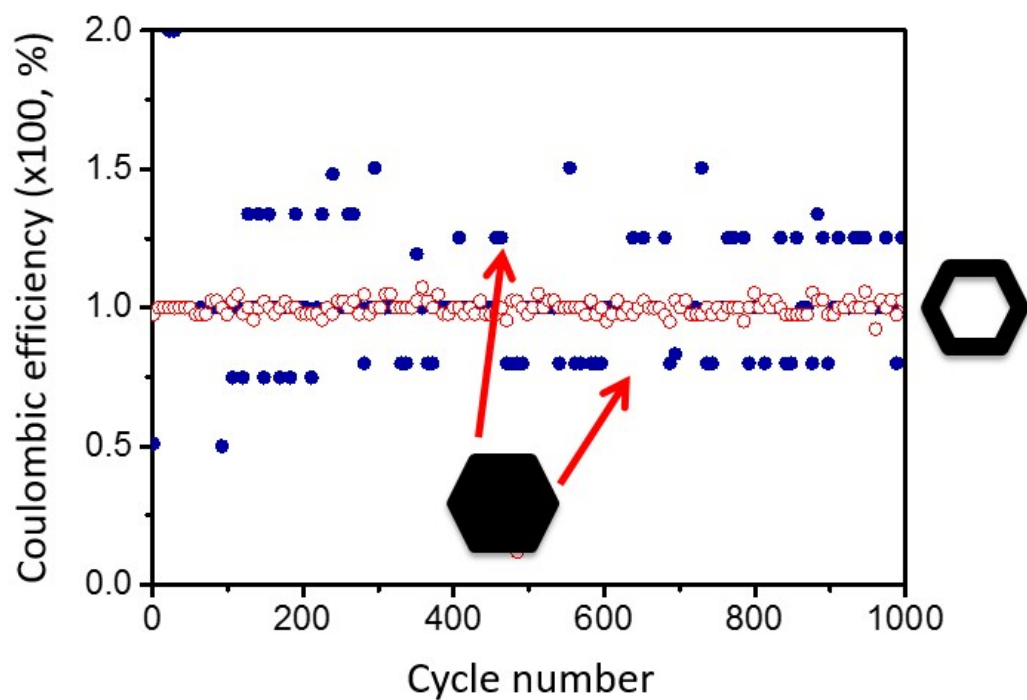

**Fig. S12** Coulombic efficiency of the electrodes prepared with non-hollow carbon nanoparticles and hollow carbon nanobubbles cycled at a current density of  $10,000 \text{ mA} \cdot \text{g}^{-1}$ .

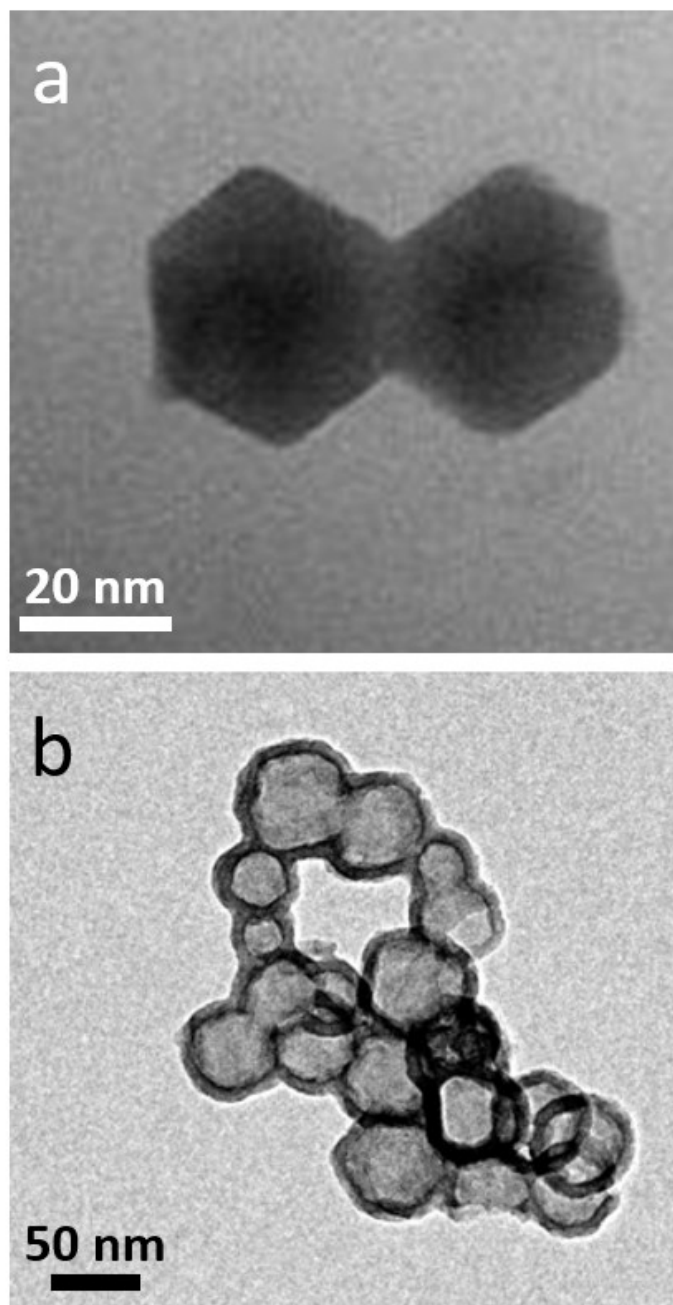

**Fig. S13** TEM images of (a) the non-hollow carbon nanoparticles and (b) the hollow carbon nanobubbles after 1,000 charge/discharge cycles at a current density of  $10,000 \text{ mA g}^{-1}$ .

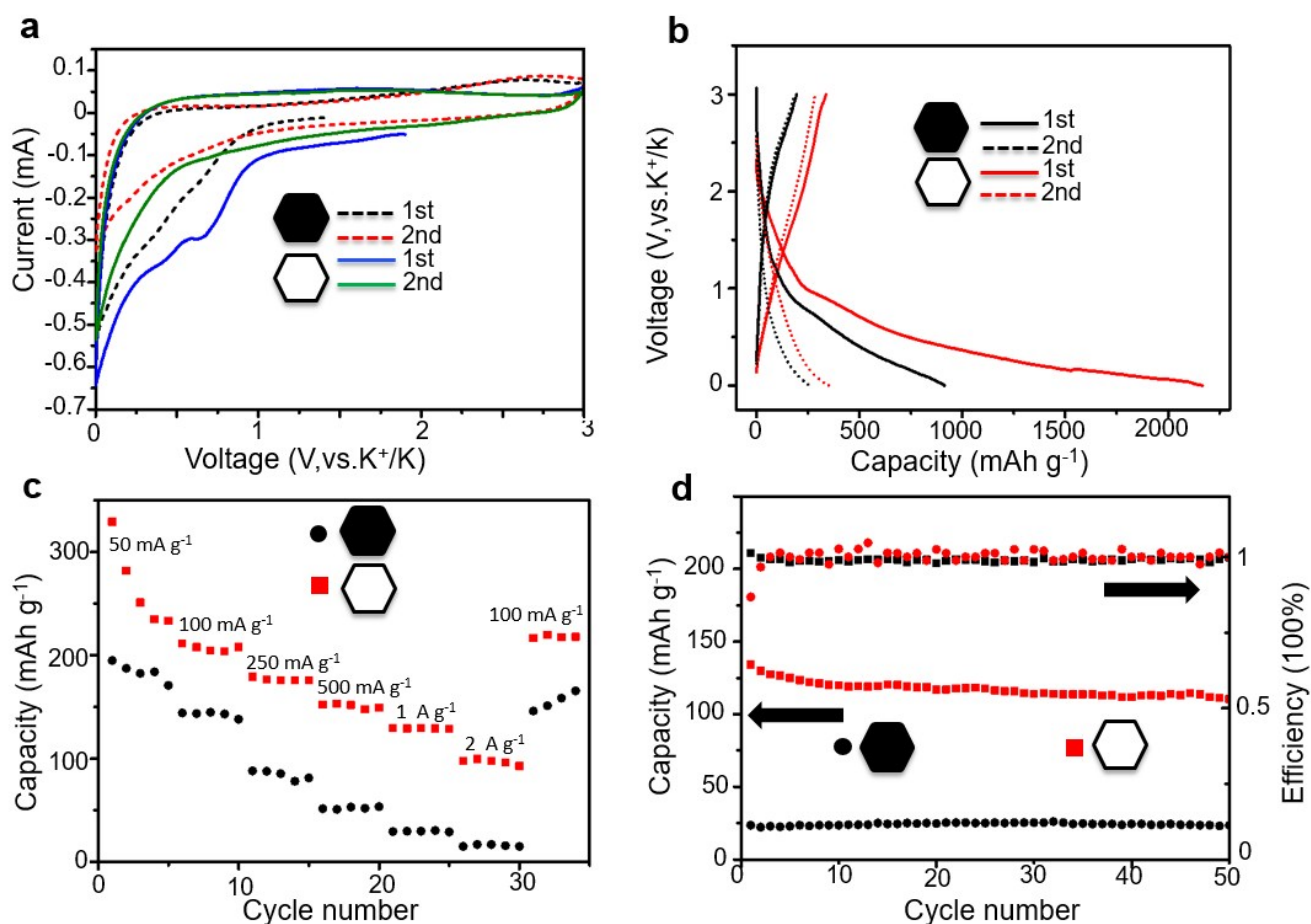

**Fig. S14** (a) CV curves for the first 2 cycles of the hollow carbon nanobubbles and non-hollow carbon nanoparticles between 0.001 and 3.000 V (vs.  $K^+/K$ ) at a potential sweep rate of  $0.1 \text{ mV s}^{-1}$ . (b) Galvanostatic charge/discharge curves for the first 2 cycles between 0.001 and 3.000 V (vs.  $K^+/K$ ) at a current density of  $50 \text{ mA g}^{-1}$ . (c) Rate performance and (d) cycling performance of the hollow carbon nanobubbles and non-hollow carbon nanoparticles. The electrodes were first activated by discharge/charge at a current density of  $50 \text{ mA g}^{-1}$  in the initial cycle before testing at the current density of  $1 \text{ A g}^{-1}$ .

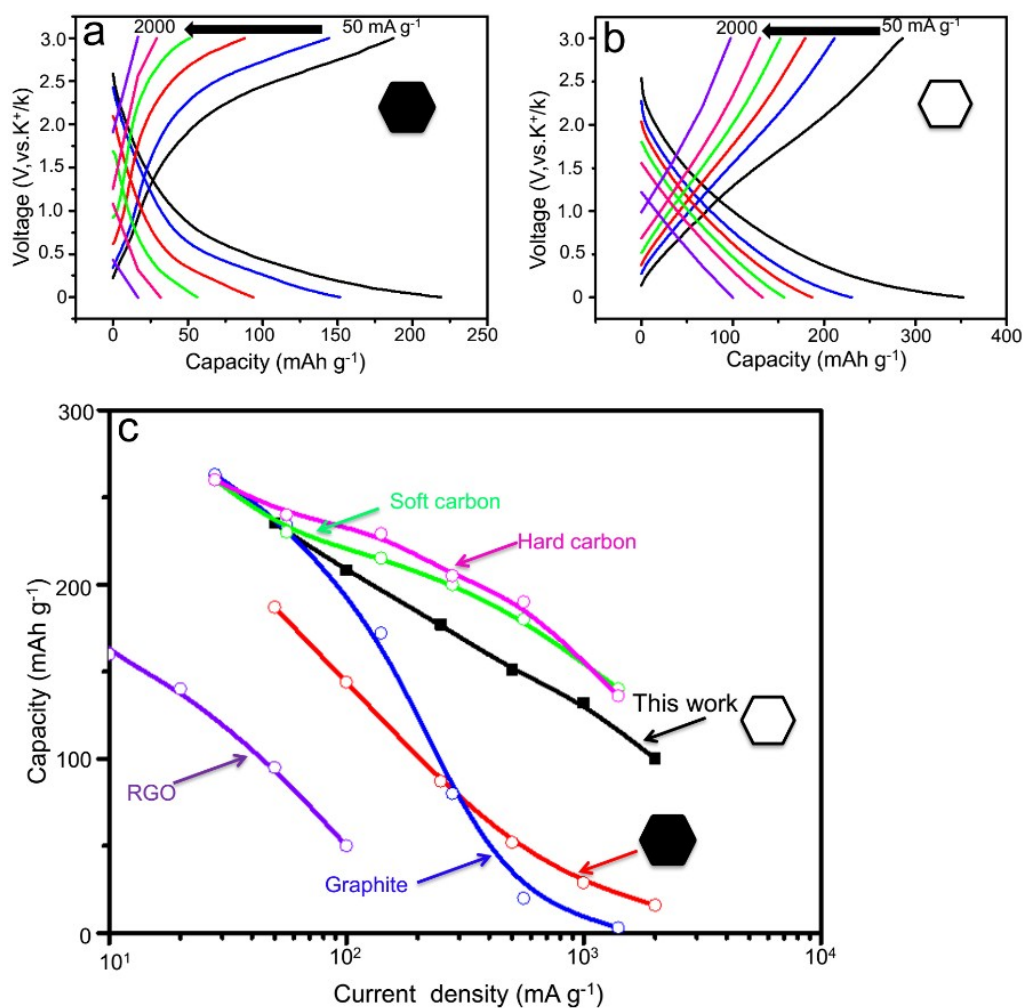

**Fig. S15** (a, b) Galvanostatic charge/discharge curves of the non-hollow carbon nanoparticles and the hollow carbon nanobubbles between 0.001 and 3.000 V (vs. K<sup>+</sup>/K) at various current densities ranging from 50 to 2,000 mA·g<sup>-1</sup>. (c) Comparison of rate capacity of our carbon materials with other published materials such as hard carbon microspheres<sup>R1</sup>, soft carbon<sup>R2</sup>, reduced graphene oxide (RGO), and graphite<sup>R3</sup>.

- R1 Jian, Z., Xing, Z., Bommier, C., Li, Z. & Ji, X. Hard Carbon Microspheres: Potassium-Ion Anode versus Sodium-Ion Anode. *Advanced Energy Materials* **6**, 1501874 (2016).
- R2 Jian, Z., Luo, W. & Ji, X. Carbon Electrodes for K-Ion Batteries. *Journal of the American Chemical Society* **137**, 11566-11569 (2015).
- R3 Luo, W. *et al.* Potassium Ion Batteries with Graphitic Materials. *Nano Letters* **15**, 7671-7677 (2015).

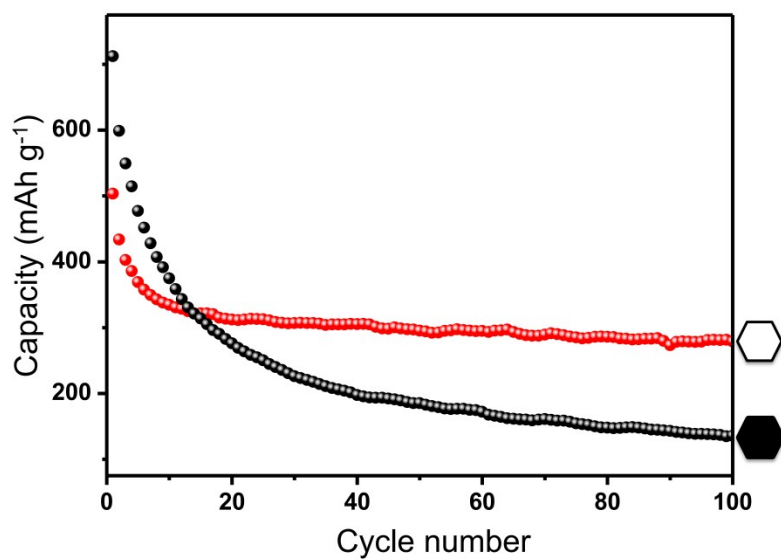

**Figure S16.** Cycling performance of non-hollow carbon and hollow carbon as cathodes for Li-S battery at a current density of  $100 \text{ mA} \cdot \text{g}^{-1}$ .
